# Supplementary material for: Identification of novel candidate variants including COL6A6 polymorphisms in early-onset atopic dermatitis using whole-exome sequencing
Source: BMC Med Genet. 2017 Jan 26;18:8. doi: 10.1186/s12881-017-0368-9 (PMC5270287; doi:10.1186/s12881-017-0368-9)

## **Supplementary methods**

### **Statistical Analysis**

Using logistic regression analysis, crude odds ratios (ORs), and 95% confidence intervals (CIs), associations between atopic dermatitis and the SNPs under investigation were calculated. Associations between *COL6A6* polymorphisms and AD were assessed using Fisher's exact test, as this test is most commonly used for this type of case-control study.

Supplementary data

Table S1. Clinical characteristics of the subjects

|                              | Healthy controls | Early onset-AD |
|------------------------------|------------------|----------------|
| Total, <i>n</i>              | 61               | 112            |
| Age, years, mean±SD          | 0.9 ± 0.7        | 1.8 ± 0.8      |
| Male %                       | 54.1%            | 63.4%          |
| Total IgE, KU/L              | -                | 159.5 ± 294.6  |
| Eosinophils, mm <sup>3</sup> | -                | 382.0 ± 422.9  |

**Table S2. Odds ratios (ORs) and 95% confidence intervals (CIs) for atopic dermatitis associated with *COL6A6* polymorphisms in Korean patients.**

| SNP         | Allele       |              |                            |                 | Genotype (Dominant) |         |                            |                 | Genotype (Recessive) |         |                            |                 |
|-------------|--------------|--------------|----------------------------|-----------------|---------------------|---------|----------------------------|-----------------|----------------------|---------|----------------------------|-----------------|
|             | Minor allele | Major allele | OR (95% CI)                | <i>p</i> -value | Case                | Control | OR (95% CI)                | <i>p</i> -value | Case                 | Control | OR (95% CI)                | <i>p</i> -value |
| rs16830494  | A            | G            | 0.7971 (0.4465 to 1.4231)  | 0.4431          | AA+GA               | GG      | 0.7181 (0.3694 to 1.3958)  | 0.3288          | AA                   | GA+GG   | 1.6667 (0.1696 to 16.3780) | 0.6613          |
| rs59021909  | T            | C            | 0.9691(0.4837 to 1.9417)   | 0.9295          | TT+TC               | CC      | 0.8676 (0.4088 to 1.8413)  | 0.7114          | TT                   | TC+CC   | 2.7828 (0.1315 to 58.9004) | 0.5111          |
| rs200963433 | T            | C            | 2.2000 (0.2431 to 19.9057) | 0.4829          | TT+TC               | CC      | 2.2222 (0.2428 to 20.3374) | 0.4796          | TT                   | TC+CC   | 0.5020 (0.0098 to 25.6072) | 0.7312          |

**Table S3. Fliaggrin variants detected in three families**

| AD-associated variants |          |      |             |                   |      |        | Functional prediction program |           |        |           |        |            |        |
|------------------------|----------|------|-------------|-------------------|------|--------|-------------------------------|-----------|--------|-----------|--------|------------|--------|
| Gene                   | #RS      | Chr  | POS         | Amino acid change | Type | Family | SIFT                          | Polyphen2 | PhyloP | PhastCons | Global | East Asian | Korean |
| <i>FLG</i>             | .        | chr1 | 152,277,578 | A3262T            | cSNP | A      | 1                             | 0.995     | 0.628  | 0.009     | .      | .          | .      |
| <i>FLG</i>             | 80088153 | chr1 | 152,276,803 | Q3520P            | cSNP | B      | 0.32                          | 0.996     | -0.086 | .         | 0.01   | 0.05       | .      |
| <i>FLG2</i>            | 2282302  | chr1 | 152,329,369 | C298S             | cSNP | C      | 0.97                          | 0.965     | -0.065 | 0.999     | 0.17   | 0.21       | 0.218  |

**Figure S1. Pedigree diagrams of three families with atopic dermatitis.** Squares indicate males, and circles indicate females. Solid symbols represent affected individuals with AD. Unshaded symbols represent unaffected individuals.

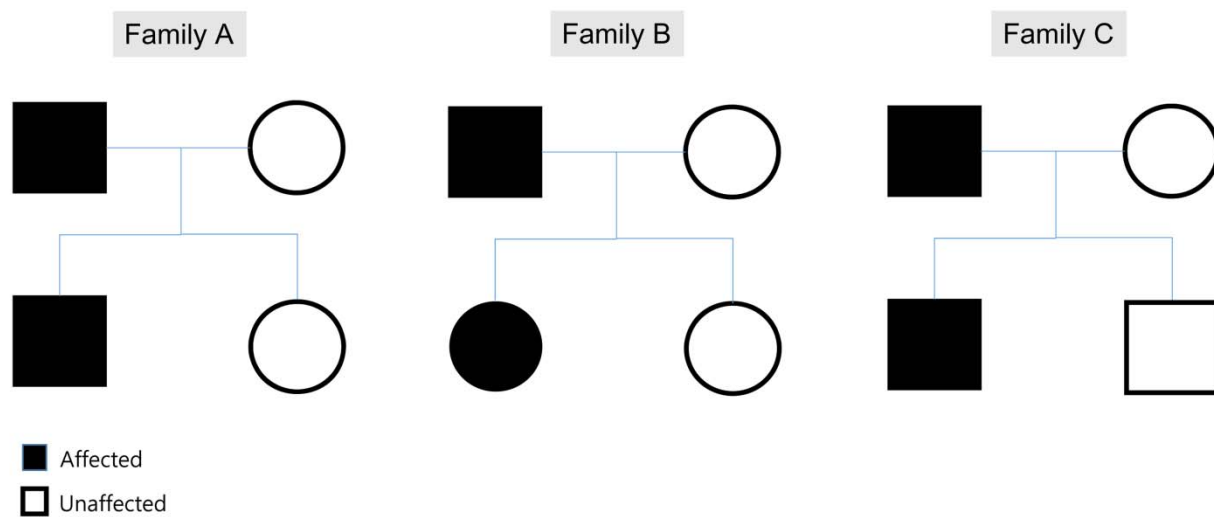

**Figure S2. Flow chart of the process for filtering variants.**

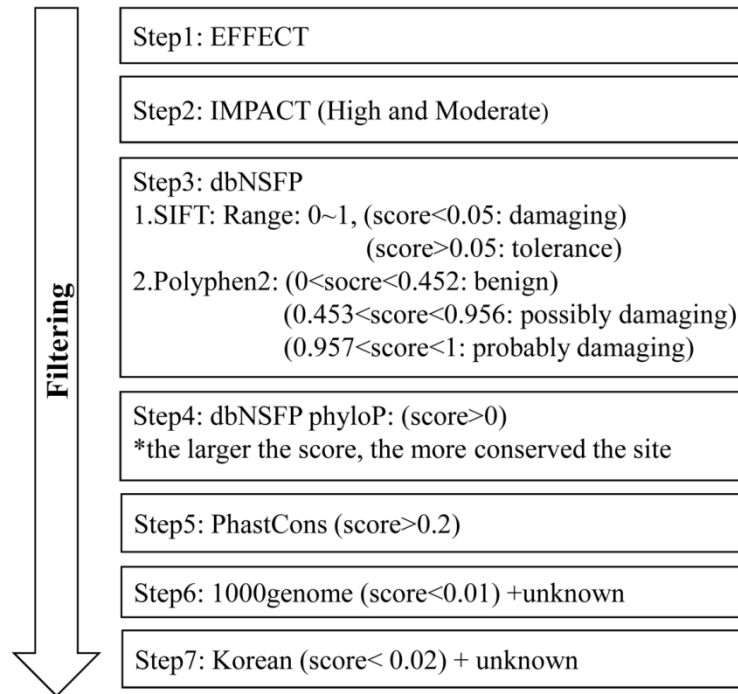

**Figure S3. A Venn diagram showing the number of overlapping genes.** A Venn diagram depicting the number of overlapping genes with common and rare variants among the three families.

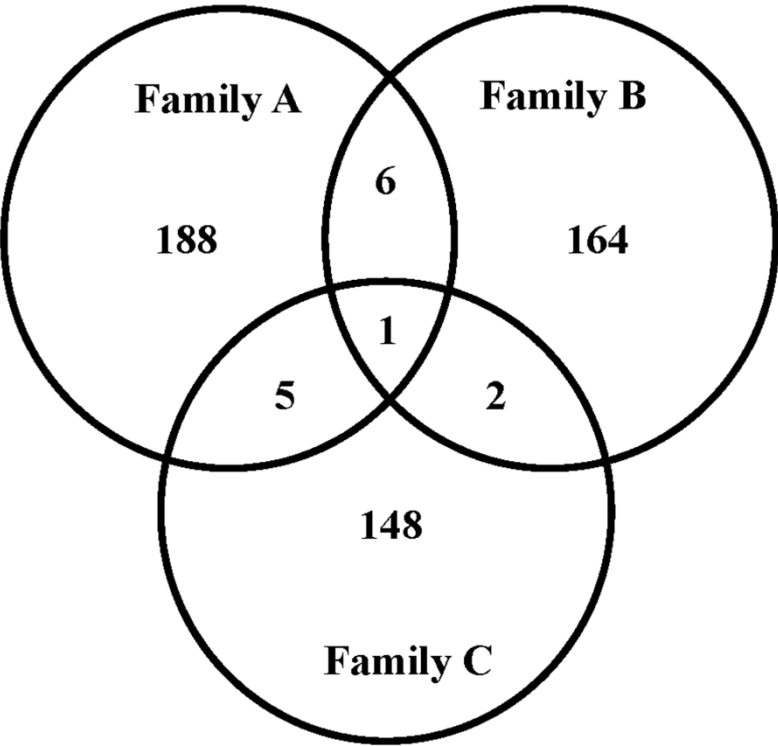

Supplement: Additional file 1: Table S1. — Clinical characteristics of the subjects. Table S2. Odds ratios (ORs) and 95% confidence intervals (CIs) for atopic dermatitis associated with COL6A6 polymorphisms in Korean patients. Table S3. Fliaggrin variants detected in three families. Figure S1. Pedigree diagrams of three families with atopic dermatitis. Figure S2. Flow chart of the process for filtering variants. Figure S3. A Venn diagram showing the number of overlapping genes. (PDF 258 kb) [file 12881_2017_368_MOESM1_ESM.pdf]
